# Supplementary material
Source: publisher figshare collection journal article supplement (https://rs.figshare.com/ndownloader/files/14871071)
Supplement: Supplementary file 1 [file 14871071]

## Sheet: KOs
KO	ANCOM W	Host group(s)	mean:bat.not-hematophagous	mean:bat.hematophagous	mean:bird.not-hematophagous	mean:bird.hematophagous	Description
K00176	6290, 5945	bats_birds	180.587	2463.53	152.059	1876.72	korD, oorD; 2-oxoglutarate ferredoxin oxidoreductase subunit delta [EC:1.2.7.3]
K00177	6280, 5950	bats_birds	185.565	2448.35	146.353	1875.68	korC, oorC; 2-oxoglutarate ferredoxin oxidoreductase subunit gamma [EC:1.2.7.3]
K00385	6035, 6120	bats_birds	69.7826	745.953	23.4118	663.04	asrC; anaerobic sulfite reductase subunit C
K00437	6288, 5812	bats_birds	21.5	737.302	7.88235	222.96	hydB; [NiFe] hydrogenase large subunit [EC:1.12.2.1]
K00532	6260, 5724	bats_birds	23.5435	737	8.88235	229.04	E1.12.7.2; ferredoxin hydrogenase [EC:1.12.7.2]
K00634	6187, 5606	bats_birds	113.435	2219.98	148.235	1008.72	ptb; phosphate butyryltransferase [EC:2.3.1.19]
K00929	6118, 5775	bats_birds	144.826	2228.95	149.824	1101.6	buk; butyrate kinase [EC:2.7.2.7]
K01034	6121, 5594	bats_birds	59.5217	861.279	74.9412	553.6	atoD; acetate CoA/acetoacetate CoA-transferase alpha subunit [EC:2.8.3.8 2.8.3.9]
K01163	6248, 6105	bats_birds	87.6522	950.116	19.5882	672.88	K01163; uncharacterized protein
K01677	6150, 5755	bats_birds	102.609	975.651	84.1765	665.08	E4.2.1.2AA, fumA; fumarate hydratase subunit alpha [EC:4.2.1.2]
K01678	6149, 5761	bats_birds	100.152	973.558	83.0588	662.48	E4.2.1.2AB, fumB; fumarate hydratase subunit beta [EC:4.2.1.2]
K02547	6328, 5635	bats_birds	21.3043	766.744	10.7059	229.16	mecR1; methicillin resistance protein
K03537	6344, 5766	bats_birds	18.3913	735.93	7.88235	222.24	POP5; ribonuclease P/MRP protein subunit POP5 [EC:3.1.26.5]
K05919	5990, 5721	bats_birds	113.522	762.674	128.647	668.6	dfx; superoxide reductase [EC:1.15.1.2]
K05922	5774, 5529	bats_birds	32.4348	203.86	2.11765	223.12	hydB; quinone-reactive Ni/Fe-hydrogenase large subunit [EC:1.12.5.1]
K05927	6054, 5847	bats_birds	54.9348	405.488	2	408.48	hydA; quinone-reactive Ni/Fe-hydrogenase small subunit [EC:1.12.5.1]
K06334	6027, 5741	bats_birds	139.935	1493.47	53.4118	558.44	cotJC; spore coat protein JC
K06399	5914, 5743	bats_birds	145.348	1495.95	53.3529	558.72	spoIVB; stage IV sporulation protein B [EC:3.4.21.116]
K06909	5792, 5569	bats_birds	150.935	776.442	128.706	561.6	xtmB; phage terminase large subunit
K07138	6147, 5652	bats_birds	98.6957	761.512	42.5882	329.28	K07138; uncharacterized protein
K07650	6201, 5685	bats_birds	36.413	736.953	9.05882	223.36	cssS; two-component system, OmpR family, sensor histidine kinase CssS [EC:2.7.13.3]
K09711	6277, 5727	bats_birds	28.6304	737.721	8.47059	222.48	K09711; uncharacterized protein
K09729	6251, 6117	bats_birds	45.3261	744.977	12.4118	552.48	K09729; uncharacterized protein
K09944	5885, 5645	bats_birds	27.5	202.791	1.17647	208.36	K09944; uncharacterized protein
K10793	6336, 5710	bats_birds	18.5217	736.093	8.52941	223.8	prdA; D-proline reductase (dithiol) PrdA [EC:1.21.4.1]
K10795	6338, 5706	bats_birds	18.4783	735.442	8.47059	223.52	prdD; D-proline reductase (dithiol)-stabilizing protein PrdD
K10796	6382, 5820	bats_birds	36.7609	1470.47	16.1765	445.64	prdE; D-proline reductase (dithiol)-stabilizing protein PrdE
K11063	6345, 5770	bats_birds	18.1957	735.093	7.76471	222.08	tcdAB; toxin A/B
K11200	5938, 5974	bats_birds	97.8696	808.326	54.1765	571.64	PTS-Mng-EIIC, mngA, hrsA; PTS system, 2-O-A-mannosyl-D-glycerate-specific IIC component
K13820	6274, 5740	bats_birds	21.9565	735.721	8.47059	225.4	fliR-flhB; flagellar biosynthetic protein FliR/FlhB
K15024	6000, 5827	bats_birds	91.2391	760.256	118.706	666.68	K15024; putative phosphotransacetylase [EC:2.3.1.8]
K00030	5957	bats	110.413	829.093			IDH3; isocitrate dehydrogenase (NAD+) [EC:1.1.1.41]
K00043	6327	bats	20.087	736.465			gbd; 4-hydroxybutyrate dehydrogenase [EC:1.1.1.61]
K00086	6044	bats	69.1522	861.651			dhaT; 1,3-propanediol dehydrogenase [EC:1.1.1.202]
K00171	5815	bats	28.8478	216.837			porD; pyruvate ferredoxin oxidoreductase delta subunit [EC:1.2.7.1]
K00175	5849	bats	339.717	2596.58			korB, oorB, oforB; 2-oxoglutarate/2-oxoacid ferredoxin oxidoreductase subunit beta [EC:1.2.7.3 1.2.7.11]
K00179	6021	bats	123.957	777.535			iorA; indolepyruvate ferredoxin oxidoreductase, alpha subunit [EC:1.2.7.8]
K00180	6022	bats	124.043	777.837			iorB; indolepyruvate ferredoxin oxidoreductase, beta subunit [EC:1.2.7.8]
K00194	6303	bats	26.3913	745.767			cdhD, acsD; acetyl-CoA decarbonylase/synthase complex subunit delta [EC:2.1.1.245]
K00197	6290	bats	29.4348	748.698			cdhE, acsC; acetyl-CoA decarbonylase/synthase complex subunit gamma [EC:2.1.1.245]
K00198	6236	bats	97.1087	1490.79			cooS, acsA; anaerobic carbon-monoxide dehydrogenase catalytic subunit [EC:1.2.7.4]
K00811	6087	bats	77.587	809.093			ASP5; aspartate aminotransferase, chloroplastic [EC:2.6.1.1]
K01035	6292	bats	29.1739	855.698			atoA; acetate CoA/acetoacetate CoA-transferase beta subunit [EC:2.8.3.8 2.8.3.9]
K01210	6070	bats	38.5435	764.116			E3.2.1.58; glucan 1,3-beta-glucosidase [EC:3.2.1.58]
K01303	6286	bats	25.1304	745.209			APEH; acylaminoacyl-peptidase [EC:3.4.19.1]
K01444	6125	bats	66.0435	817.488			AGA, aspG; N4-(beta-N-acetylglucosaminyl)-L-asparaginase [EC:3.5.1.26]
K01726	6030	bats	107	1010.33			GAMMACA; gamma-carbonic anhydrase [EC:4.2.1.-]
K01777	5860	bats	90.3043	756.93			prdF; proline racemase [EC:5.1.1.4]
K01905	6296	bats	25.6087	739.767			acdA; acetate---CoA ligase (ADP-forming) subunit alpha [EC:6.2.1.13]
K02688	6207	bats	39.8696	747.14			prpR; transcriptional regulator, propionate catabolism operon regulatory protein
K02782	6278	bats	33.087	736.419			PTS-Gut-EIIB, srlE; PTS system, glucitol/sorbitol-specific IIB component [EC:2.7.1.198]
K03191	5831	bats	15.3043	215.023			ureI; acid-activated urea channel
K03465	5969	bats	120.065	997.047			thyX, thy1; thymidylate synthase (FAD) [EC:2.1.1.148]
K03481	6109	bats	120.043	1521.58			glvR; RpiR family transcriptional regulator, glv operon transcriptional regulator
K03491	5882	bats	288.109	4450.79			licR; lichenan operon transcriptional antiterminator
K03660	6185	bats	119.435	1510.28			OGG1; N-glycosylase/DNA lyase [EC:3.2.2.- 4.2.99.18]
K04076	5817	bats	81.7391	740.651			lonB; ATP-dependent Lon protease [EC:3.4.21.53]
K04794	6314	bats	21.8913	736.907			PTH2; peptidyl-tRNA hydrolase, PTH2 family [EC:3.1.1.29]
K05020	6012	bats	114.109	855.326			opuD, betL; glycine betaine transporter
K05739	6267	bats	75.4565	1474.02			seaA; uncharacterized protein
K05792	6050	bats	48.913	764.233			terA; tellurite resistance protein TerA
K05967	6020	bats	62.0652	744.907			K05967; uncharacterized protein
K06333	6026	bats	129.848	1485.49			cotJB; spore coat protein JB
K06416	5792	bats	102.239	756.256			spoVS; stage V sporulation protein S
K06436	5820	bats	82.913	741.814			yabG; spore coat assemly protein
K06714	6029	bats	77.3261	750.93			rocR; arginine utilization regulatory protein
K06864	6022	bats	101.304	803.698			larE; pyridinium-3,5-biscarboxylic acid mononucleotide sulfurtransferase [EC:4.4.1.37]
K06898	6078	bats	92.0652	803.163			larB; pyridinium-3,5-biscarboxylic acid mononucleotide synthase [EC:2.5.1.143]
K06927	5995	bats	79.6304	817.744			DPH6; diphthine-ammonia ligase [EC:6.3.1.14]
K06976	6016	bats	135.587	1514.67			K06976; uncharacterized protein
K07033	6115	bats	78.3478	762.093			K07033; uncharacterized protein
K07079	6039	bats	100.261	779.233			K07079; uncharacterized protein
K07097	5836	bats	28	202.93			K07097; uncharacterized protein
K07099	6091	bats	54.5	753.233			K07099; uncharacterized protein
K07311	6042	bats	81.413	803.977			ynfG; Tat-targeted selenate reductase subunit YnfG
K07321	6248	bats	90.0217	1497.14			cooC; CO dehydrogenase maturation factor
K07464	5768	bats	150.457	797.767			cas4; CRISPR-associated exonuclease Cas4 [EC:3.1.12.1]
K07467	6093	bats	96.8913	1527.84			rstA1; phage replication initiation protein
K07710	5936	bats	15.4783	204.512			atoS; two-component system, NtrC family, sensor histidine kinase AtoS [EC:2.7.13.3]
K07723	5814	bats	84.5	741.372			ndoAI; CopG family transcriptional regulator / antitoxin EndoAI
K07813	5956	bats	131.826	1520.51			agrB; accessory gene regulator B
K08070	6118	bats	102	1606.65			E1.3.1.74; 2-alkenal reductase [EC:1.3.1.74]
K08077	5846	bats	28.0217	205.512			NUDT14; UDP-sugar diphosphatase [EC:3.6.1.45]
K08217	5757	bats	136.022	782.14			mef; MFS transporter, DHA3 family, macrolide efflux protein
K08600	5985	bats	122.261	781.93			srtB; sortase B [EC:3.4.22.70]
K09116	5959	bats	9.34783	205.837			K09116; uncharacterized protein
K09696	6093	bats	63.4348	772.302			natB; sodium transport system permease protein
K09697	6099	bats	64.087	776.628			natA; sodium transport system ATP-binding protein [EC:7.2.2.3]
K09703	6029	bats	118.217	891.186			K09703; uncharacterized protein
K09707	5877	bats	82.9348	764.953			K09707; uncharacterized protein
K09716	6306	bats	21.7609	736.512			dtdA, GEK1; D-aminoacyl-tRNA deacylase [EC:3.1.1.96]
K09726	5986	bats	5.82609	207.349			K09726; uncharacterized protein
K09758	6152	bats	32.7826	745.093			asdA; aspartate 4-decarboxylase [EC:4.1.1.12]
K09770	5810	bats	85.2609	746.581			K09770; uncharacterized protein
K09804	5826	bats	35.9565	219.163			K09804; uncharacterized protein
K09860	5904	bats	27.4783	204.326			K09860; uncharacterized protein
K09951	5956	bats	123.804	981.581			cas2; CRISPR-associated protein Cas2
K10231	6083	bats	60.5	794.651			kojP; kojibiose phosphorylase [EC:2.4.1.230]
K10670	6249	bats	171.413	2231.19			grdA; glycine/sarcosine/betaine reductase complex component A [EC:1.21.4.2 1.21.4.3 1.21.4.4]
K10672	6301	bats	85.5	1474.33			grdB; glycine reductase complex component B subunit gamma [EC:1.21.4.2]
K10829	6113	bats	1.23913	202.233			E3.6.3.34; iron-chelate-transporting ATPase [EC:3.6.3.34]
K11041	5931	bats	69.1739	780.023			eta; exfoliative toxin A/B
K11261	6274	bats	53.9783	768.535			fwdE, fmdE; formylmethanofuran dehydrogenase subunit E [EC:1.2.7.12]
K11358	5961	bats	96.6522	760.628			yhdR; aspartate aminotransferase [EC:2.6.1.1]
K12247	5874	bats	27.3478	202.256			cstII, cstIII; alpha-2,3 sialyltransferase [EC:2.4.99.-]
K12251	5961	bats	195.587	1208.6			aguB; N-carbamoylputrescine amidase [EC:3.5.1.53]
K12960	5753	bats	377.326	3066.09			mtaD; 5-methylthioadenosine/S-adenosylhomocysteine deaminase [EC:3.5.4.31 3.5.4.28]
K13019	5899	bats	11.7609	209.86			wbpI, wlbD; UDP-GlcNAc3NAcA epimerase [EC:5.1.3.23]
K13275	6193	bats	51.1304	736.256			isp; major intracellular serine protease [EC:3.4.21.-]
K13626	5910	bats	152.587	991.372			fliW; flagellar assembly factor FliW
K13689	5803	bats	53.3913	202.279			cgtA; beta-1,4-N-acetylgalactosaminyltransferase [EC:2.4.1.-]
K13797	6119	bats	1.30435	202.535			rpoBC; DNA-directed RNA polymerase subunit beta-beta' [EC:2.7.7.6]
K14048	5750	bats	16.087	218.209			ureAB; urease subunit gamma/beta [EC:3.5.1.5]
K14138	6357	bats	79	2237.67			acsB; acetyl-CoA synthase [EC:2.3.1.169]
K14534	6057	bats	90.6957	764.837			abfD; 4-hydroxybutyryl-CoA dehydratase / vinylacetyl-CoA-Delta-isomerase [EC:4.2.1.120 5.3.3.3]
K00394	5950	birds			11.7059	332.08	aprA; adenylylsulfate reductase, subunit A [EC:1.8.99.2]
K01518	6124	birds			6	330.16	NUDT2; bis(5'-nucleosidyl)-tetraphosphatase [EC:3.6.1.17]
K01583	5639	birds			15	96.2	E4.1.1.19; arginine decarboxylase [EC:4.1.1.19]
K01615	6087	birds			18.2353	423.12	gcdA; glutaconyl-CoA decarboxylase [EC:4.1.1.70]
K01713	6094	birds			2.29412	330.44	pheC; cyclohexadienyl dehydratase [EC:4.2.1.51 4.2.1.91]
K01846	5768	birds			283.824	1056.52	glmS, mutS, mamA; methylaspartate mutase sigma subunit [EC:5.4.99.1]
K02190	5812	birds			306.059	1059.72	cbiK; sirohydrochlorin cobaltochelatase [EC:4.99.1.3]
K02490	5901	birds			20.2353	336.2	spo0F; two-component system, response regulator, stage 0 sporulation protein F
K02589	6081	birds			4.17647	336.72	nifHD1, nifI1; nitrogen regulatory protein PII 1
K02590	6081	birds			4.17647	336.72	nifHD2, nifI2; nitrogen regulatory protein PII 2
K02765	5955	birds			55.7059	701.2	PTS-Dgl-EIIC, gamP; PTS system, D-glucosamine-specific IIC component
K02850	6028	birds			40.4118	661.36	waaY, rfaY; heptose II phosphotransferase [EC:2.7.1.-]
K03148	5568	birds			353.824	844.08	thiF; sulfur carrier protein ThiS adenylyltransferase [EC:2.7.7.73]
K03312	5670	birds			418.588	1635.64	gltS; glutamate:Na+ symporter, ESS family
K03390	5665	birds			22.9412	331.04	hdrC2; heterodisulfide reductase subunit C2 [EC:1.8.7.3 1.8.98.4 1.8.98.5 1.8.98.6]
K03653	5599	birds			61.5882	659.28	K03653; N-glycosylase/DNA lyase [EC:3.2.2.- 4.2.99.18]
K03796	5548	birds			289.765	615.52	bax; Bax protein
K04769	5647	birds			47.2941	337.16	spoVT; AbrB family transcriptional regulator, stage V sporulation protein T
K06012	5650	birds			47.0588	337.08	gpr; spore protease [EC:3.4.24.78]
K06120	6146	birds			0.470588	329.32	dhaB; glycerol dehydratase large subunit [EC:4.2.1.30]
K06121	6146	birds			0.470588	329.32	dhbC; glycerol dehydratase medium subunit [EC:4.2.1.30]
K06209	5922	birds			40.2941	449.24	pheB; chorismate mutase [EC:5.4.99.5]
K06283	5670	birds			44.6471	337.48	spoIIID; putative DeoR family transcriptional regulator, stage III sporulation protein D
K06379	5650	birds			47.0588	337.24	spoIIAB; stage II sporulation protein AB (anti-sigma F factor) [EC:2.7.11.1]
K06382	5677	birds			44.4706	336.92	spoIIE; stage II sporulation protein E [EC:3.1.3.16]
K06383	5687	birds			43.4706	336.24	spoIIGA; stage II sporulation protein GA (sporulation sigma-E factor processing peptidase) [EC:3.4.23.-]
K06387	5647	birds			46.8235	336.84	spoIIR; stage II sporulation protein R
K06390	5686	birds			44.2941	334.04	spoIIIAA; stage III sporulation protein AA
K06391	5730	birds			40.7647	333.24	spoIIIAB; stage III sporulation protein AB
K06392	5652	birds			46.6471	337.24	spoIIIAC; stage III sporulation protein AC
K06393	5677	birds			43.6471	333.48	spoIIIAD; stage III sporulation protein AD
K06396	5659	birds			45.6471	336.84	spoIIIAG; stage III sporulation protein AG
K06397	5656	birds			45.9412	336.76	spoIIIAH; stage III sporulation protein AH
K06398	5651	birds			47.0588	337.32	spoIVA; stage IV sporulation protein A
K06410	5634	birds			45.5294	331.32	spoVFA; dipicolinate synthase subunit A
K06411	5667	birds			42.7647	330.64	spoVFB; dipicolinate synthase subunit B
K06438	5668	birds			45	336.84	yqfD; similar to stage IV sporulation protein
K06882	5626	birds			1.23529	208.36	K06882; uncharacterized protein
K07069	6108	birds			3.29412	337.28	K07069; uncharacterized protein
K07129	6124	birds			2.29412	330.24	K07129; uncharacterized protein
K07149	5735	birds			89.7059	610.6	K07149; uncharacterized protein
K07316	5804	birds			23.1765	334.12	mod; adenine-specific DNA-methyltransferase [EC:2.1.1.72]
K07455	5573	birds			51.1176	352.96	recT; recombination protein RecT
K07699	5638	birds			48.3529	337.36	spo0A; two-component system, response regulator, stage 0 sporulation protein A
K07717	6011	birds			21	422.32	ycbA, glnK; two-component system, sensor histidine kinase YcbA [EC:2.7.13.3]
K07719	6010	birds			21.0588	422.56	ycbB, glnL; two-component system, response regulator YcbB
K07796	5853	birds			48	349.56	cusC, silC; outer membrane protein, Cu(I)/Ag(I) efflux system
K08100	5996	birds			6.35294	331.24	E1.3.3.5; bilirubin oxidase [EC:1.3.3.5]
K08974	5667	birds			54.8824	384.32	K08974; putative membrane protein
K09700	5819	birds			15.8824	333.32	K09700; uncharacterized protein
K09775	5838	birds			89.5882	668.08	K09775; uncharacterized protein
K09777	5574	birds			74.4118	439	K09777; uncharacterized protein
K10938	5826	birds			1.47059	347.4	acfC; accessory colonization factor AcfC
K11922	5615	birds			64.1765	350.8	mngR, farR; GntR family transcriptional regulator, mannosyl-D-glycerate transport/metabolism system repressor
K12267	5817	birds			209.882	1823	msrAB; peptide methionine sulfoxide reductase msrA/msrB [EC:1.8.4.11 1.8.4.12]
K13479	5962	birds			41.4118	340.08	ygeT, xdhB; xanthine dehydrogenase FAD-binding subunit [EC:1.17.1.4]
K13922	5542	birds			285.941	402.68	pduP; propionaldehyde dehydrogenase [EC:1.2.1.87]
K13954	5801	birds			102.529	1362.28	yiaY; alcohol dehydrogenase [EC:1.1.1.1]

## Sheet: KEGG pathways
Pathway	ANCOM W	Host group(s)	mean:bat.not-hematophagous	mean:bat.hematophagous	mean:bird.not-hematophagous	mean:bird.hematophagous
Organismal Systems;Immune System;RIG-I-like receptor signaling pathway	277, 222	bats_birds	282.13	46.7674	235.941	47.28
Unclassified Cellular;Processes and Signaling;Sporulation	303, 288	bats_birds	6954.07	27287.6	4294.41	12512.8
Cellular Processes;Cell Motility;Flagellar assembly	272	bats	20497.5	47513.5
Human Diseases;Infectious Diseases;Toxoplasmosis	303	bats	305.522	222.581
Cellular Processes;Cell Growth and Death;Apoptosis	244	birds			845.118	81.88
Cellular Processes;Cell Growth and Death;Meiosis - yeast	253	birds			2140.18	179.76
Cellular Processes;Cell Growth and Death;p53 signaling pathway	238	birds			694.882	67.88
Environmental Information Processing;Signaling Molecules and Interaction;G protein-coupled receptors	230	birds			25.8824	0.24
Genetic Information Processing;Transcription;Basal transcription factors	238	birds			483.765	31.88
Genetic Information Processing;Translation;mRNA surveillance pathway	250	birds			126.529	3.08
Genetic Information Processing;Translation;RNA transport	219	birds			4818.76	4658.6
Human Diseases;Cancers;Colorectal cancer	247	birds			679.824	50.24
Human Diseases;Cancers;Prostate cancer	273	birds			816.941	1062.56
Human Diseases;Cancers;Small cell lung cancer	254	birds			705.235	51.72
Human Diseases;Cardiovascular Diseases;Viral myocarditis	247	birds			680.412	50.24
Human Diseases;Infectious Diseases;African trypanosomiasis	214	birds			784.706	176.04
Human Diseases;Infectious Diseases;Amoebiasis	247	birds			620.706	57.92
Human Diseases;Infectious Diseases;Epithelial cell signaling in Helicobacter pylori infection	225	birds			2330.71	2250.24
Human Diseases;Infectious Diseases;Influenza A	257	birds			731.882	50.44
Human Diseases;Infectious.Diseases;Staphylococcus aureus infection	247	birds			1267.88	1796
Metabolism;Amino Acid Metabolism;Tryptophan metabolism	223	birds			30822.9	8964.72
Metabolism;Biosynthesis of Other Secondary Metabolites;Betalain biosynthesis	248	birds			129.647	7.16
Metabolism;Biosynthesis of Other Secondary Metabolites;Flavone and flavonol biosynthesis	223	birds			129.941	13.8
Metabolism;Biosynthesis of Other Secondary Metabolites;Indole alkaloid biosynthesis	244	birds			96	5.48
Metabolism;Lipid Metabolism;Steroid biosynthesis	231	birds			564.059	64.84
Metabolism;Lipid Metabolism;Steroid hormone biosynthesis	232	birds			1139.82	161
Metabolism;Metabolism of Cofactors and Vitamins;Biotin metabolism	232	birds			6072.29	5897.72
Metabolism;Metabolism of Terpenoids and Polyketides;Biosynthesis of type II polyketide backbone	234	birds			36.3529	2.04
Metabolism;Metabolism of Terpenoids and Polyketides;Geraniol degradation	223	birds			17176.4	3500.52
Metabolism;Metabolism of Terpenoids and Polyketides;Limonene and pinene degradation	222	birds			19630.1	5521.6
Metabolism;Xenobiotics Biodegradation and Metabolism;Aminobenzoate degradation	223	birds			23391.4	6917.6
Metabolism;Xenobiotics Biodegradation and Metabolism;Caprolactam degradation	225	birds			12717.4	2372.36
Metabolism;Xenobiotics Biodegradation and Metabolism;Chlorocyclohexane and chlorobenzene degradation	213	birds			4748.76	1272.8
Metabolism;Xenobiotics Biodegradation and Metabolism;Drug metabolism - cytochrome P450	223	birds			9560.18	2609.4
Metabolism;Xenobiotics Biodegradation and Metabolism;Fluorobenzoate degradation	232	birds			3499.53	604.76
Metabolism;Xenobiotics Biodegradation and Metabolism;Metabolism of xenobiotics by cytochrome P450	222	birds			9105.06	2547.48
Organismal Systems;Digestive System;Bile secretion	232	birds			110.529	10.12
Organismal Systems;Digestive System;Mineral absorption	215	birds			538.706	106.52
Organismal Systems;Digestive System;Protein digestion and absorption	225	birds			257.588	37.92
Organismal Systems;Endocrine System;Melanogenesis	233	birds			26.3529	0.32
Organismal Systems;Endocrine System;Progesterone-mediated oocyte maturation	273	birds			815.059	1062.16
Organismal Systems;Environmental Adaptation;Circadian rhythm - plant	233	birds			357.824	43.52
Organismal Systems;Immune System;Antigen processing and presentation	273	birds			815.059	1062.16
Organismal Systems;Immune System;NOD-like receptor signaling pathway	275	birds			832.647	1093.52
Unclassified;Genetic Information Processing;Restriction enzyme	227	birds			5867.18	5931.8
